# Supplementary material for: Block copolymers based on poly(butylene adipate) and poly(l-lactic acid) for biomedical applications: synthesis, structure and thermodynamical studies
Source: Royal Society of Chemistry journal article supplement (doi:10.1039/d0sm02053b), 2020-12-29
Supplement: d0sm02053b1.pdf [file d0sm02053b1.pdf]

# Supplementary Information

for

## Block Copolymers based on Poly(butylene adipate) and Poly(*L*-lactic acid) for Biomedical Applications: Synthesis, Structure and Thermo-Dynamical Studies

Vasiliki Karava<sup>a</sup>, Aggeliki Siamidi<sup>a</sup>, Marilena Vlachou<sup>a,\*</sup>, Evi Christodoulou<sup>b</sup>, Alexandra Zamboulis<sup>b</sup>, Dimitrios N. Bikiaris<sup>b</sup>, Apostolos Kyritsis<sup>c</sup>, and Panagiotis A. Klonos<sup>b,c\*</sup>

<sup>a</sup> *Department of Pharmacy, Section of Pharmaceutical Technology, National and Kapodistrian University of Athens, Zografou Campus, 15784, Athens, Greece*

<sup>b</sup> *Department of Chemistry, Laboratory of Polymer Chemistry and Technology, Aristotle University of Thessaloniki, GR-541 24, Thessaloniki, Greece*

<sup>c</sup> *Department of Physics, National Technical University of Athens (NTUA), Zografou Campus, 15780, Athens, Greece*

<sup>\*</sup> *Corresponding authors: vlachou@pharm.uoa.gr (V.M.), pklonos@central.ntua.gr (P.A.K.)*

## S1. Additional DSC data

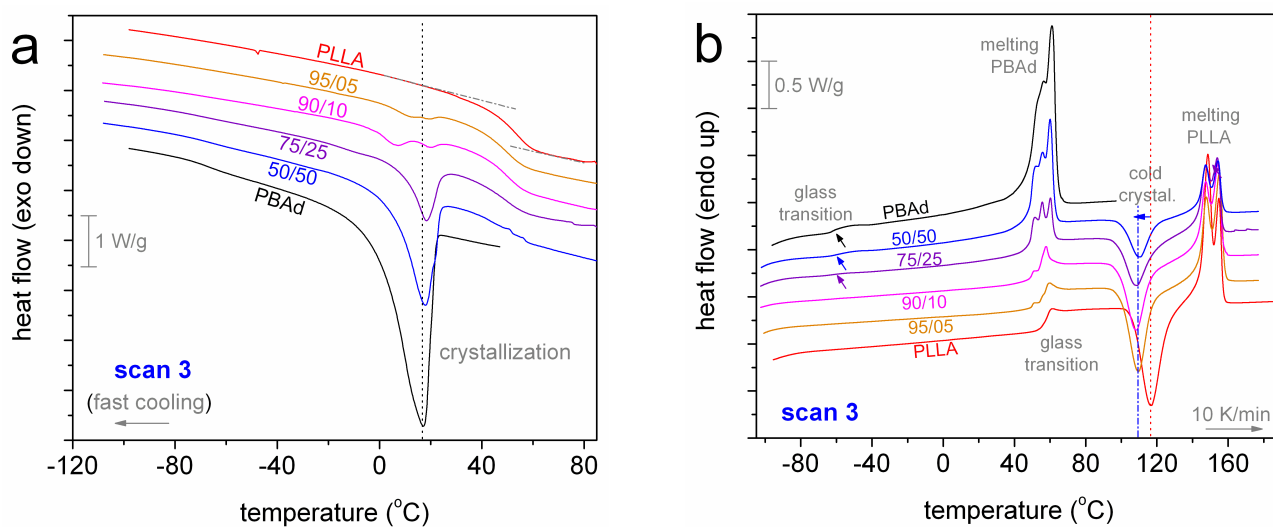

**Figure S1.** DSC thermograms of *scan 3* (fast cooling) for all samples studied during (a) cooling from the melt and (b) the subsequent heating. The heat flow values are normalized to the sample mass. The main thermal events are indicated on the thermograms.

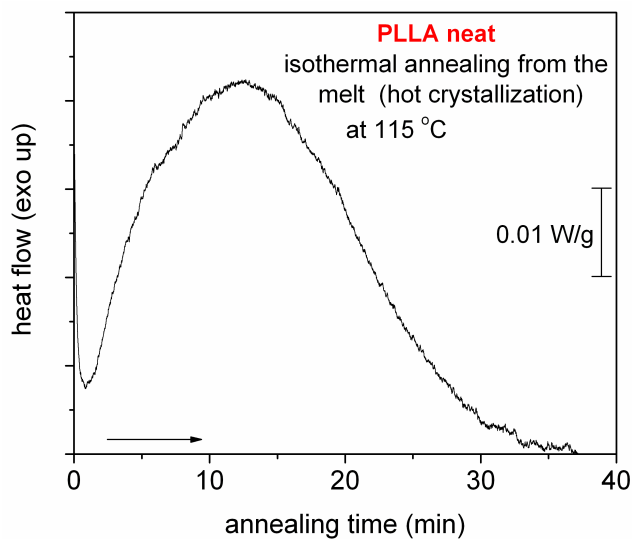

**Figure S2.** DSC thermogram during isothermal annealing at 115 °C of neat PLLA (initially melted). The heat flow has been normalized to the sample mass.

## S2. Additional XRD data - analysis

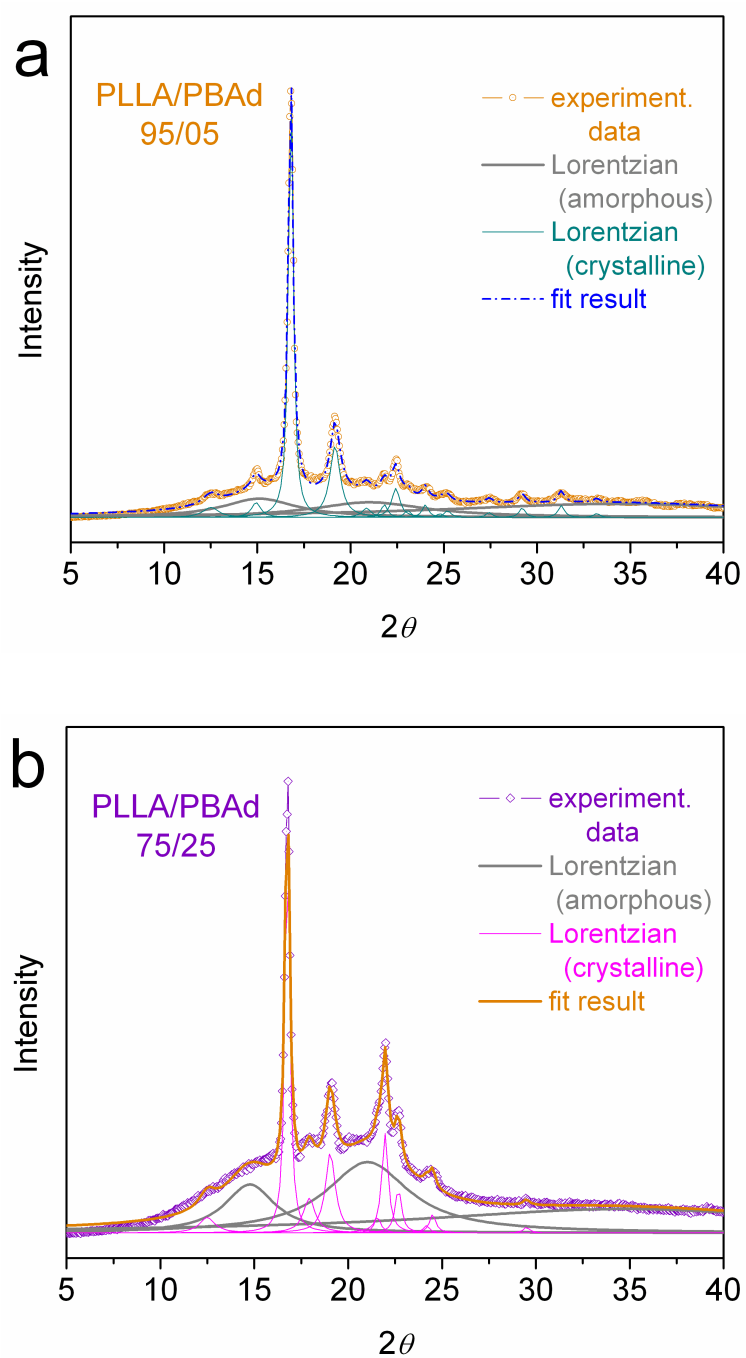

**Figure S3.** Analysis results of the XRD results for the PLLA/PBAAd copolymers (a) 95/05 and (b) 75/25, in terms of Lorentzians.

### S3. Additional BDS raw data and examples of analysis

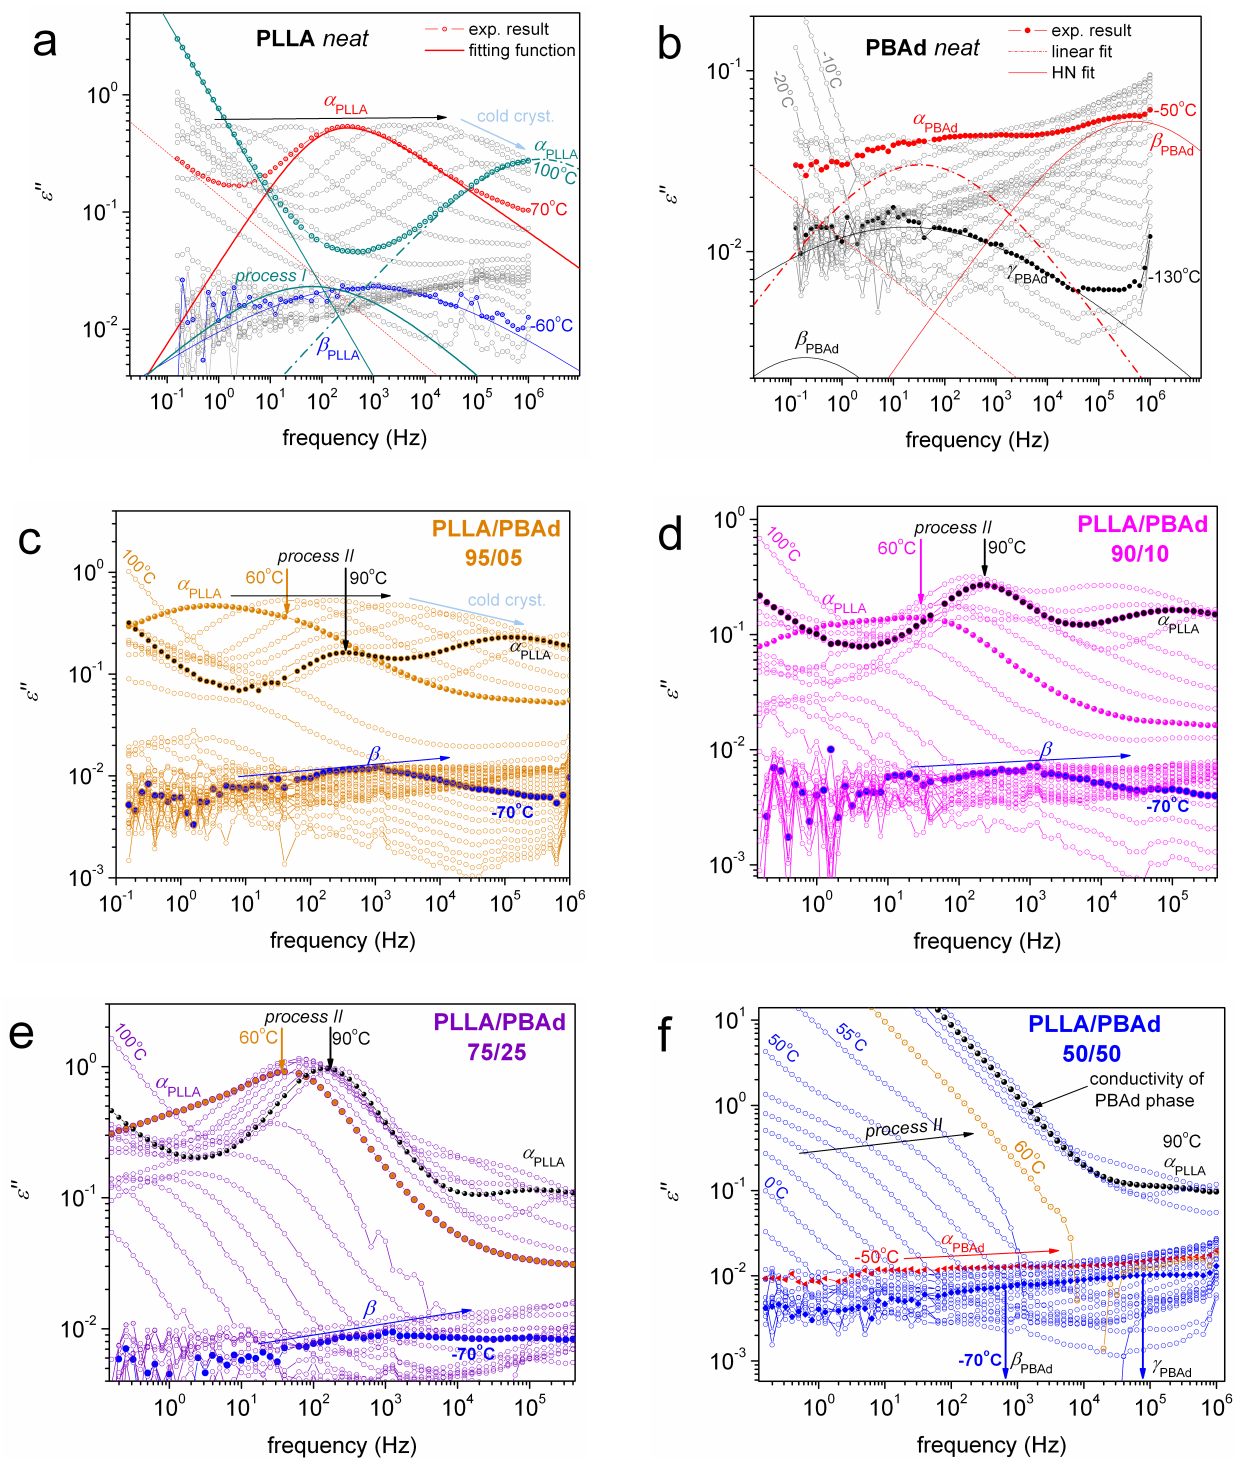

**Figure S4.** Isothermal BDS plots of  $\epsilon''$  against frequency, for all samples indicated on the plots. In (a) and (b) along with the experimental data, examples of analysis employing individual Havriliak-Negami (HN, peaks) and linear (signal upcoming / conductivity) terms are shown at selected temperatures.

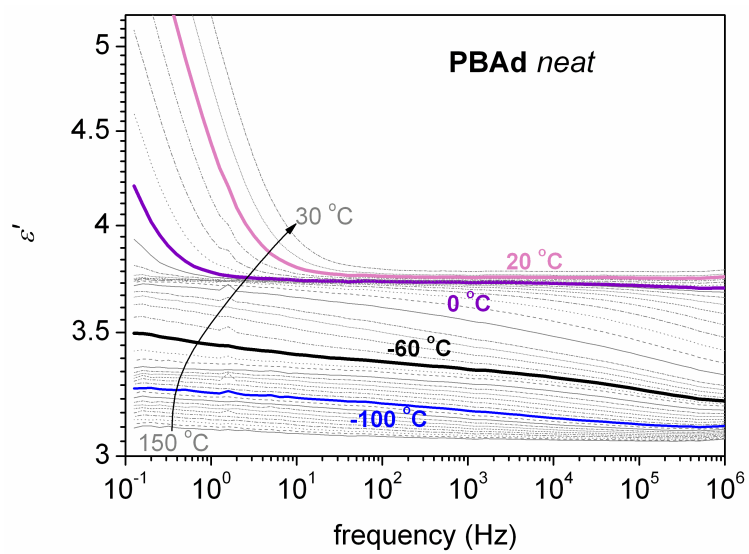

**Figure S5.** BDS raw results for neat PBAd in terms of the frequency dependence of the real,  $\epsilon'$ , part of dielectric permittivity.
